# Supplementary material
Source: Springer Nature journal article supplement (https://www.springermedizin.de/resource/supplementary/12888_2013_1640_MOESM3_ESM.pdf/9481044)

Study nameStatistics for each studyOdds ratio and 95% CI

|                                 | Odds ratio | Lower limit | Upper limit | p-Value |
|---------------------------------|------------|-------------|-------------|---------|
| Crum et al. 1993 [38]           | 1.54       | 0.78        | 3.04        | 0.218   |
| Fergusson et al. 1996 [42]      | 1.20       | 0.51        | 2.84        | 0.678   |
| Brook et al. 1998 [28]          | 1.16       | 1.00        | 1.35        | 0.053   |
| Brook et al. 2001 [29] combined | 1.18       | 0.94        | 1.48        | 0.153   |
| Degenhardt et al. 2001 [39]     | 0.88       | 0.60        | 1.29        | 0.513   |
| Chabrol et al. 2005 [34]        | 1.36       | 0.83        | 2.22        | 0.222   |
| Lamers et al. 2006 [44]         | 0.55       | 0.15        | 2.03        | 0.368   |
| Zolensky et al. 2006 [54]       | 0.89       | 0.62        | 1.28        | 0.528   |
| van Laar et al. 2007 [52]       | 1.18       | 0.71        | 1.97        | 0.525   |
| Wittchen et al. 2007 [53]       | 1.50       | 1.09        | 2.07        | 0.014   |
| Buckner & Schmidt 2008 [31]     | 0.81       | 0.50        | 1.33        | 0.409   |
| Chabrol et al. 2008 [35]        | 1.94       | 1.14        | 3.30        | 0.015   |
| NCS-R 2010 [37,55] combined     | 2.04       | 1.50        | 2.78        | 0.000   |
| Buckner et al. 2012 [32]        | 1.05       | 0.62        | 1.80        | 0.853   |
| Degenhardt et al. 2013 [41]     | 3.20       | 1.11        | 9.25        | 0.032   |
|                                 | 1.24       | 1.06        | 1.45        | 0.006   |

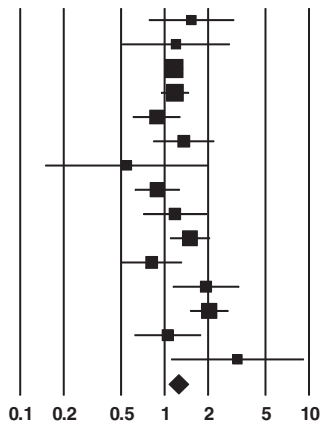

- association + association

**Funnel Plot of Standard Error by Log odds ratio**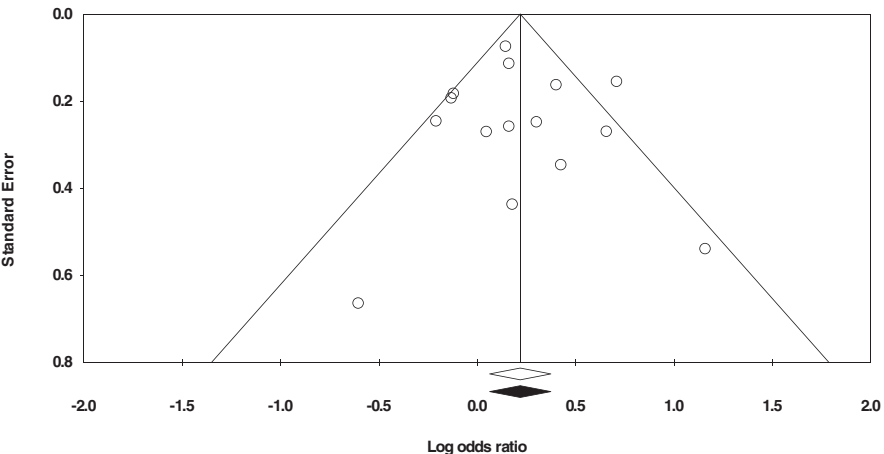

Supplement: MOESM3 [file 9481044]
